# Supplementary material for: Synaptotagmin 5 Controls SYP132-VAMP721/722 Interaction for Arabidopsis Immunity to Pseudomonas syringae pv tomato DC3000
Source: PubMed Central journal article supplement — Mol Cells. 2021 Sep 10;44(9):670–9. doi: 10.14348/molcells.2021.0100 (PMC8490205; doi:10.14348/molcells.2021.0100), 2021-09-10
Supplement: molce-44-9-670-Supple.pdf [file molce-44-9-670-Supple.pdf]

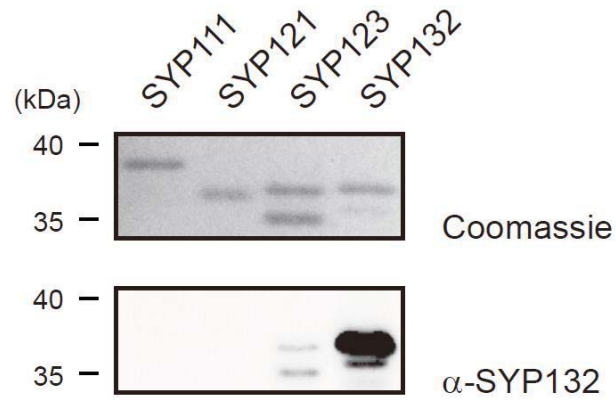

**Supplementary Fig. S1. Specificity of anti-SYP132 antibody.** The indicated recombinant proteins belonging to the Arabidopsis SYP1 group were purified from *E. coli*, separated in an acrylamide gel, and subject to Coomassie staining (500 ng each) or immunoblot with anti-SYP132 antibody (10 ng each).

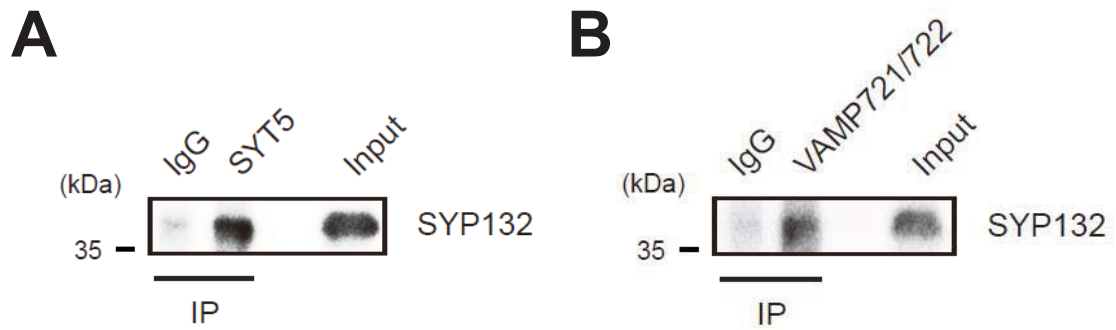

**Supplementary Fig. S2. *In vivo* SYT5-SYP132 and SYP132-VAMP721/722 interactions.** Protein extracts from WT plants were subject to precipitation with anti-SYT5 (A) or anti-VAMP721/722 antibody (B). As a control protein extracts were also precipitated with rabbit IgG. Respective immunoprecipitates (IP) were then subject to immunoblot with anti-SYP132 antibody. Input, 3% of used protein extracts for immunoprecipitation.

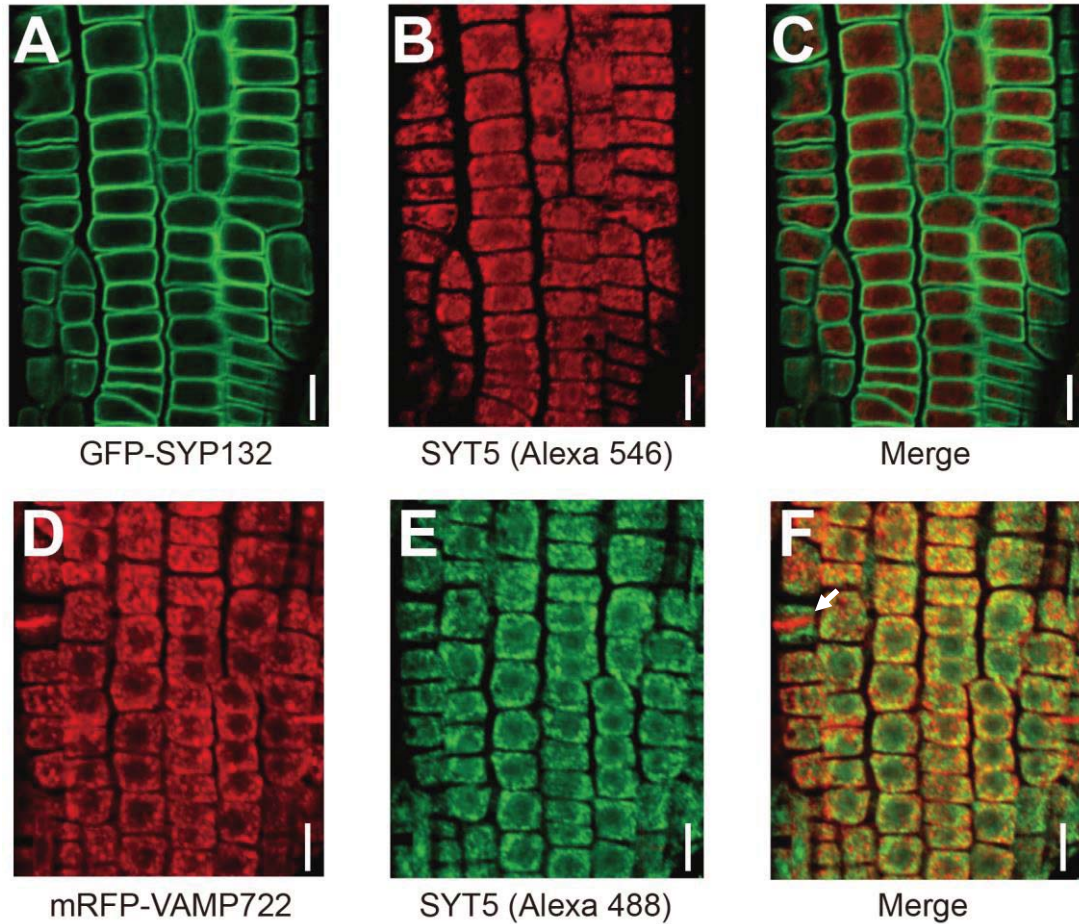

**Supplementary Fig. S3. Subcellular localization of SYT5 in Arabidopsis roots.** (A-C) Roots of GFP-SYP132-expressing plants were immunohistochemically analyzed with anti-SYT5 antibody. The anti-SYT5 antibody was visualized with the Alexa 546 (red fluorescence)-conjugated anti-rabbit IgG antibody. Fluorescent images were analyzed by confocal microscopy. Bar, 10 µm. (D-F) Roots of mRFP-VAMP722-expressing plants were immunohistochemically analyzed with anti-SYT5 antibody. The anti-SYT5 antibody were visualized with the Alexa 488 (green fluorescence)-conjugated anti-rabbit IgG antibody. Fluorescent images were analyzed by confocal microscopy. An arrow indicates a dividing cell. Bar, 10 µm.
